# Supplementary figures and images for: Ecotyping of Anaplasma phagocytophilum from Wild Ungulates and Ticks Shows Circulation of Zoonotic Strains in Northeastern Italy
Source: MDPI journal article supplement (doi:10.3390/ani11020310), 2021-01-26

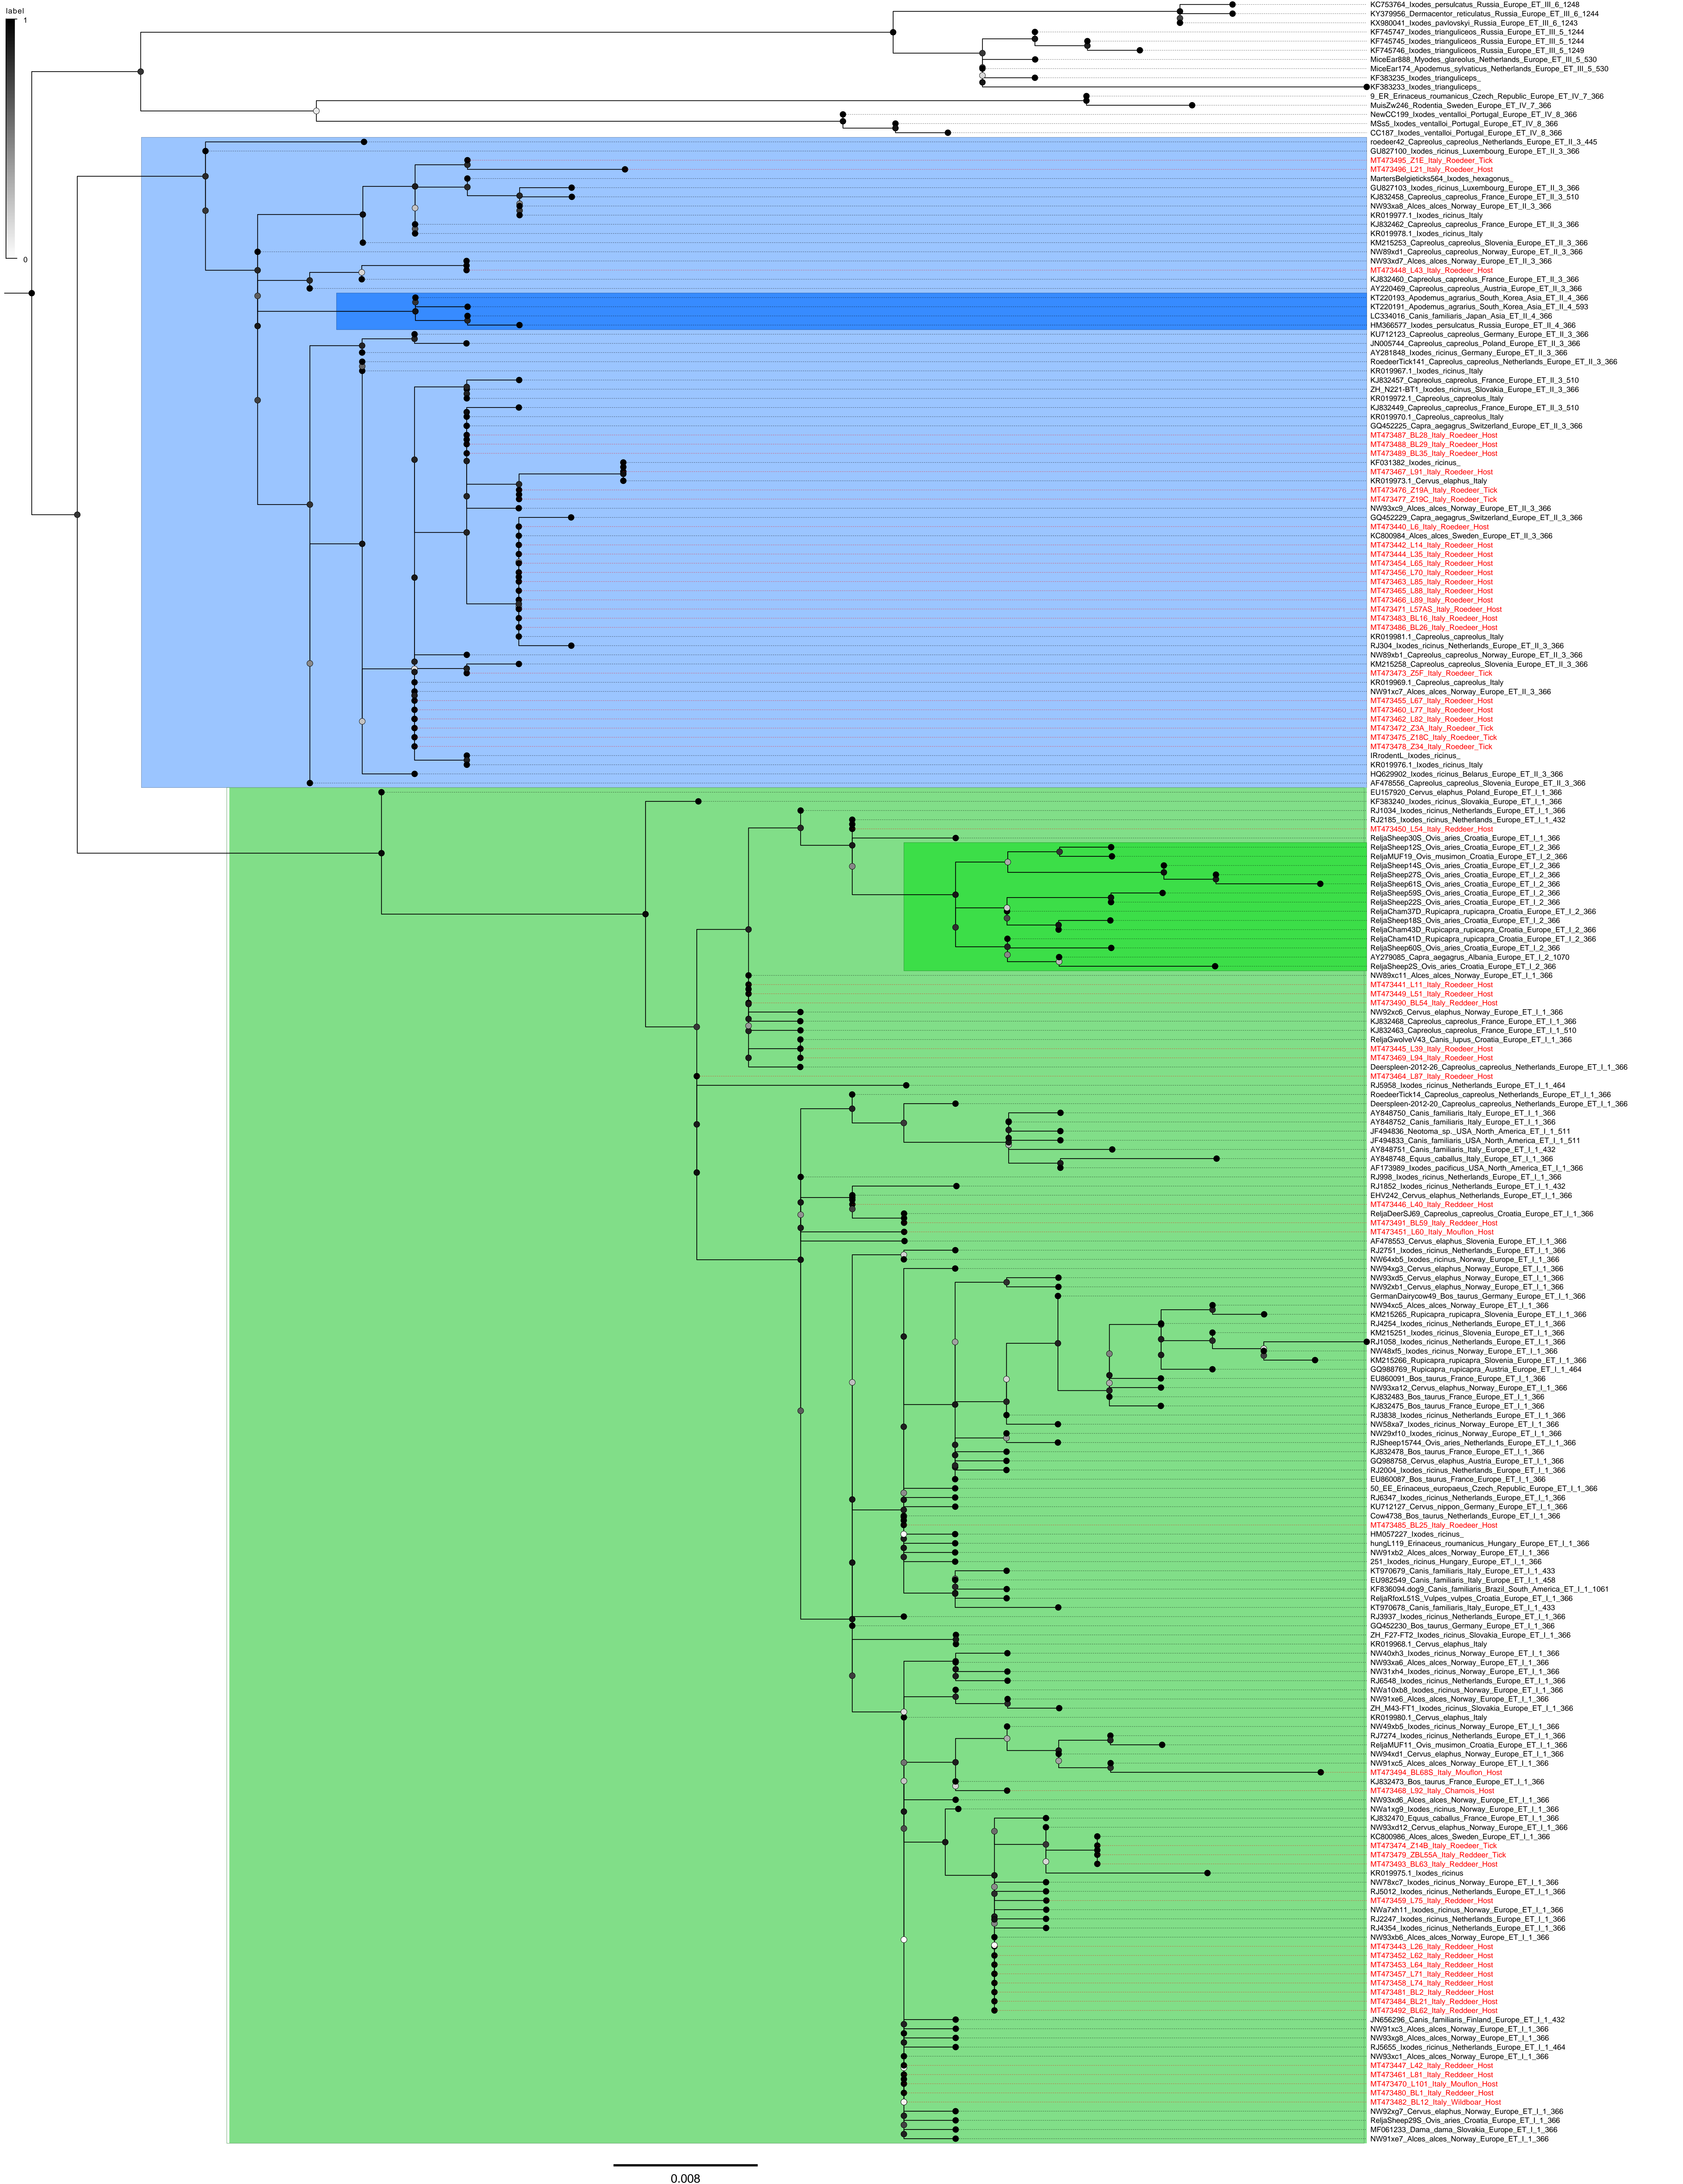

Supplement: s1 [file s1]
